# Supplementary material for: Methods for mediation analysis with high-dimensional DNA methylation data: Possible choices and comparisons
Source: PubMed Central journal article supplement (PMC10655967; doi:10.1371/journal.pgen.1011022), 2023-11-07
Supplement: pgen.1011022.s012.pdf [file pgen.1011022.s012.pdf]

**S1 Table. Summary of methods for high-dimensional mediation analysis.**

| Name and Citation      | Estimation of global indirect effect | Estimation of mediation contributions | Active mediator identification                                 | Y Data Type          | Directly Allows Covariates | Summary                                                                                                                                                                                                                                           |
|------------------------|--------------------------------------|---------------------------------------|----------------------------------------------------------------|----------------------|----------------------------|---------------------------------------------------------------------------------------------------------------------------------------------------------------------------------------------------------------------------------------------------|
| <b>Group 1 Methods</b> |                                      |                                       |                                                                |                      |                            |                                                                                                                                                                                                                                                   |
| HIMA (1)               | Point estimation                     | Point estimation                      | Yes                                                            | Continuous or binary | Yes                        | Fits the outcome model with the minimax concave penalty. Requires subsequent fitting of ordinary least squares regression to test the statistical significance the mediation contributions.                                                       |
| HDMA (2)               | Point estimation                     | Point, interval estimation            | Yes                                                            | Continuous or binary | Yes                        | Fits the outcome model with the de-sparsified LASSO penalty.                                                                                                                                                                                      |
| MedFix (3)             | Point estimation                     | Point, interval estimation            | Yes                                                            | Continuous           | Yes                        | Fits the outcome model with the adaptive LASSO penalty. Can also be applied when the exposure is high-dimensional in addition to the mediators.                                                                                                   |
| Pathway LASSO (4)      | Point estimation                     | Point estimation                      | Yes                                                            | Continuous           | No                         | Fits the outcome model and mediator models with a jointly penalized likelihood, directly applying shrinkage to the mediation contributions $(\alpha_a)_j, (\beta_m)_j$ .                                                                          |
| BSLMM (5)              | Bayesian point, interval estimation  | Bayesian interval estimation          | Yes                                                            | Continuous           | Yes                        | Bayesian mixed-model in which the mediator-outcome associations $(\beta_m)_j$ and the exposure-mediator associations $(\alpha_a)_j$ are assumed to independently follow sparse normal distributions.                                              |
| GMM (6)                | Bayesian point, interval estimation  | Bayesian interval estimation          | Yes                                                            | Continuous           | Yes                        | Bayesian mixed-model in which the mediator-outcome associations $(\beta_m)_j$ and the exposure-mediator associations $(\alpha_a)_j$ are assumed to jointly follow a sparse multivariate normal distribution.                                      |
| <b>Group 3 Methods</b> |                                      |                                       |                                                                |                      |                            |                                                                                                                                                                                                                                                   |
| PCMA (7)               | Point, interval estimation           | No                                    | No                                                             | Continuous or binary | No                         | Applies principal component analysis on the mediator model residuals, transforming the mediators so they are independent. Can be applied when there is $A-M$ interaction in the outcome model.                                                    |
| SPCMA (8)              | Point, interval estimation           | No                                    | Identifies whether subsets of the mediators are jointly active | Continuous           | No                         | Similar to PCMA but applies sparse PCA, resulting in transformed mediators that are more interpretable.                                                                                                                                           |
| HILMA (9)              | Point, interval estimation           | No                                    | No                                                             | Continuous           | No                         | Uses a debiased penalized regression approach to directly estimate the global indirect effect $\alpha_a^T \beta_m$ . Can be applied for multiple exposures simultaneously.                                                                        |
| PMED (10)              | Point, interval estimation           | No                                    | Yes                                                            | Continuous           | Yes                        | Estimates $\beta_a$ by fitting the outcome model with the mediator effects penalized by the SCAD penalty. Then estimates $\alpha_a^T \beta_m$ by subtracting the estimated $\beta_a$ from an estimate of the total effect.                        |
| <b>Group 3 Methods</b> |                                      |                                       |                                                                |                      |                            |                                                                                                                                                                                                                                                   |
| HDMM (11)              | No                                   | No                                    | Nonspecifically identifies groups of active mediators          | Continuous           | No                         | Estimates “directions of mediation” by which the observed mediators can be linearly combined to form latent mediators. The latent mediators replace the true mediators in the analysis. Requires $p < n^1$                                        |
| LVMA (12)              | No                                   | No                                    | Identifies inputted mediators associated with latent mediators | Continuous or binary | Yes                        | Reformulates the causal structure of the mediation problem. Assumes that $M$ itself is not responsible for mediation, but rather that the effect of $A$ on $Y$ is mediated by latent, unmeasured factors, $F$ , which also cause changes in $M$ . |

<sup>1</sup> The other methods can be used with more mediators than observations. However, the methods that allow covariates require fewer covariates than samples.

## References

1. Zhang H, Zheng Y, Zhang Z, Gao T, Joyce B, Yoon G, et al. Estimating and testing high-dimensional mediation effects in epigenetic studies. *Bioinformatics*. 2016 Oct 15;32(20):3150–4.
2. Gao Y, Yang H, Fang R, Zhang Y, Goode EL, Cui Y. Testing Mediation Effects in High-Dimensional Epigenetic Studies. *Front Genet*. 2019;10:1195.
3. Zhang Q. High-Dimensional Mediation Analysis with Applications to Causal Gene Identification. *Stat Biosci*. 2021;14:432–51.
4. Zhao Y, Luo X. Pathway LASSO: pathway estimation and selection with high-dimensional mediators. *Stat Interface*. 2022;15(1):39–50.
5. Song Y, Zhou X, Zhang M, Zhao W, Liu Y, Kardia SLR, et al. Bayesian shrinkage estimation of high dimensional causal mediation effects in omics studies. *Biometrics*. 2020 Sep;76(3):700–10.
6. Song Y, Zhou X, Kang J, Aung MT, Zhang M, Zhao W, et al. Bayesian sparse mediation analysis with targeted penalization of natural indirect effects. *J R Stat Soc Ser C (Applied Stat)*. 2021 Nov 1;70(5):1391–412.
7. Huang Y-T, Pan W-C. Hypothesis test of mediation effect in causal mediation model with high-dimensional continuous mediators. *Biometrics*. 2016 Jun;72(2):402–13.
8. Zhao Y, Lindquist MA, Caffo BS. Sparse principal component based high-dimensional mediation analysis. *Comput Stat Data Anal*. 2020;142:106835.
9. Zhou RR, Wang L, Zhao SD. Estimation and inference for the indirect effect in high-dimensional linear mediation models. *Biometrika*. 2020 Sep 1;107(3):573–89.
10. Guo X, Li R, Liu J, Zeng M. High-Dimensional Mediation Analysis for Selecting DNA Methylation Loci Mediating Childhood Trauma and Cortisol Stress Reactivity. *J Am Stat Assoc*. 2022 Jul 3;117(539):1110–21.
11. Chén OY, Crainiceanu C, Ogburn EL, Caffo BS, Wager TD, Lindquist MA. High-dimensional multivariate mediation with application to neuroimaging data. *Biostatistics*. 2018;19(2):121–36.
12. Derkach A, Pfeiffer RM, Chen T-H, Sampson JN. High dimensional mediation analysis with latent variables. *Biometrics*. 2019 Sep 1;75(3):745–56.
