# Supplementary material for: Methods for mediation analysis with high-dimensional DNA methylation data: Possible choices and comparisons
Source: PubMed Central journal article supplement (PMC10655967; doi:10.1371/journal.pgen.1011022), 2023-11-07
Supplement: pgen.1011022.s013.pdf [file pgen.1011022.s013.pdf]

**S2 Table. Complete list of primary simulation settings.**

| Number of potential mediators ( $p$ ) | Sample Size ( $n$ ) | Sparsity of signals | Degree of correlation | PVE <sub>A</sub> | PVE <sub>IE</sub> | PVE <sub>DE</sub> |
|---------------------------------------|---------------------|---------------------|-----------------------|------------------|-------------------|-------------------|
| 2000                                  | 2500                | Sparse              | Baseline              | 0.20             | 0.10              | 0.10              |
| 2000                                  | 2500                | Sparse              | Baseline              | 0.20             | 0.05              | 0.10              |
| 2000                                  | 2500                | Sparse              | Baseline              | 0.10             | 0.10              | 0.10              |
| 2000                                  | 2500                | Sparse              | Baseline              | 0.20             | 0.10              | 0.05              |
| 2000                                  | 2500                | Sparse              | High                  | 0.20             | 0.10              | 0.10              |
| 2000                                  | 2500                | Sparse              | High                  | 0.20             | 0.05              | 0.10              |
| 2000                                  | 2500                | Sparse              | High                  | 0.10             | 0.10              | 0.10              |
| 2000                                  | 2500                | Sparse              | High                  | 0.20             | 0.10              | 0.05              |
| 2000                                  | 2500                | Non-sparse          | Baseline              | 0.20             | 0.10              | 0.10              |
| 2000                                  | 2500                | Non-sparse          | Baseline              | 0.20             | 0.05              | 0.10              |
| 2000                                  | 2500                | Non-sparse          | Baseline              | 0.10             | 0.10              | 0.10              |
| 2000                                  | 2500                | Non-sparse          | Baseline              | 0.20             | 0.10              | 0.05              |
| 2000                                  | 1000                | Sparse              | Baseline              | 0.20             | 0.10              | 0.10              |
| 2000                                  | 1000                | Sparse              | Baseline              | 0.20             | 0.05              | 0.10              |
| 2000                                  | 1000                | Sparse              | Baseline              | 0.10             | 0.10              | 0.10              |
| 2000                                  | 1000                | Sparse              | Baseline              | 0.20             | 0.10              | 0.05              |
| 2000                                  | 1000                | Sparse              | High                  | 0.20             | 0.10              | 0.10              |
| 2000                                  | 1000                | Sparse              | High                  | 0.20             | 0.05              | 0.10              |
| 2000                                  | 1000                | Sparse              | High                  | 0.10             | 0.10              | 0.10              |
| 2000                                  | 1000                | Sparse              | High                  | 0.20             | 0.10              | 0.05              |
| 2000                                  | 1000                | Non-sparse          | Baseline              | 0.20             | 0.10              | 0.10              |
| 2000                                  | 1000                | Non-sparse          | Baseline              | 0.20             | 0.05              | 0.10              |
| 2000                                  | 1000                | Non-sparse          | Baseline              | 0.10             | 0.10              | 0.10              |
| 2000                                  | 1000                | Non-sparse          | Baseline              | 0.20             | 0.10              | 0.05              |

PVE<sub>A</sub>: Percent of variance in  $Y$  explained by the exposure. PVE<sub>IE</sub>: Percent of variance in  $Y$  explained by the indirect effect. PVE<sub>DE</sub>: Percent of variance in  $Y$  explained by the direct effect.
