# Supplementary material for: Methods for mediation analysis with high-dimensional DNA methylation data: Possible choices and comparisons
Source: PubMed Central journal article supplement (PMC10655967; doi:10.1371/journal.pgen.1011022), 2023-11-07
Supplement: pgen.1011022.s014.pdf [file pgen.1011022.s014.pdf]

**S3 Table. Complete list of additional simulation settings.**

| Modification                                        | Number of potential mediators ( $p$ ) | Sample Size ( $n$ ) | Sparsity of signals | Degree of correlation | PVE <sub>A</sub> | PVE <sub>IE</sub> | PVE <sub>DE</sub> |
|-----------------------------------------------------|---------------------------------------|---------------------|---------------------|-----------------------|------------------|-------------------|-------------------|
| Non-negative Effects                                | 2000                                  | 2500                | Sparse              | Baseline              | 0.20             | 0.10              | 0.10              |
| Non-negative Effects                                | 2000                                  | 2500                | Sparse              | Baseline              | 0.20             | 0.05              | 0.10              |
| Non-negative Effects                                | 2000                                  | 2500                | Sparse              | Baseline              | 0.10             | 0.10              | 0.10              |
| Non-negative Effects                                | 2000                                  | 2500                | Sparse              | Baseline              | 0.20             | 0.10              | 0.05              |
| Unmeasured Confounding (Variance of confounder = 1) | 2000                                  | 2500                | Sparse              | Baseline              | 0.20             | 0.10              | 0.10              |
| Unmeasured Confounding (Variance of confounder = 2) | 2000                                  | 2500                | Sparse              | Baseline              | 0.20             | 0.10              | 0.10              |
| Unmeasured Confounding (Variance of confounder = 3) | 2000                                  | 2500                | Sparse              | Baseline              | 0.20             | 0.10              | 0.10              |

PVE<sub>A</sub>: Percent of variance in  $Y$  explained by the exposure. PVE<sub>IE</sub>: Percent of variance in  $Y$  explained by the indirect effect. PVE<sub>DE</sub>: Percent of variance in  $Y$  explained by the direct effect.
